# Supplementary material for: Biomimetic material functionalized mixed matrix membranes for enhanced carbon dioxide capture
Source: Royal Society of Chemistry journal article supplement (doi:10.1039/c8ta03198c), 2018-01-01
Supplement: c8ta03198c1.pdf [file c8ta03198c1.pdf]

Supporting Information

## **Biomimetic material functionalized mixed matrix membranes for enhanced carbon dioxide capture**

Yiming Zhang,<sup>a</sup> Huixian Wang,<sup>b</sup> Siyu Zhou,<sup>a</sup> Jing Wang,<sup>a</sup> Xuezhong He,<sup>c</sup> Jindun Liu<sup>a</sup>  
and Yatao Zhang<sup>a\*</sup>

<sup>a</sup> *School of Chemical Engineering and Energy, Zhengzhou University, Zhengzhou 450001,  
China. E-mail: zhangyatao@zzu.edu.cn*

<sup>b</sup> *School of Civil Engineering and Communication, North China University of Water Resources  
and Electric Power, Zhengzhou 450045, China*

<sup>c</sup> *Department of Chemical Engineering, Norwegian University of Science and Technology, NO-  
7491, Norway*

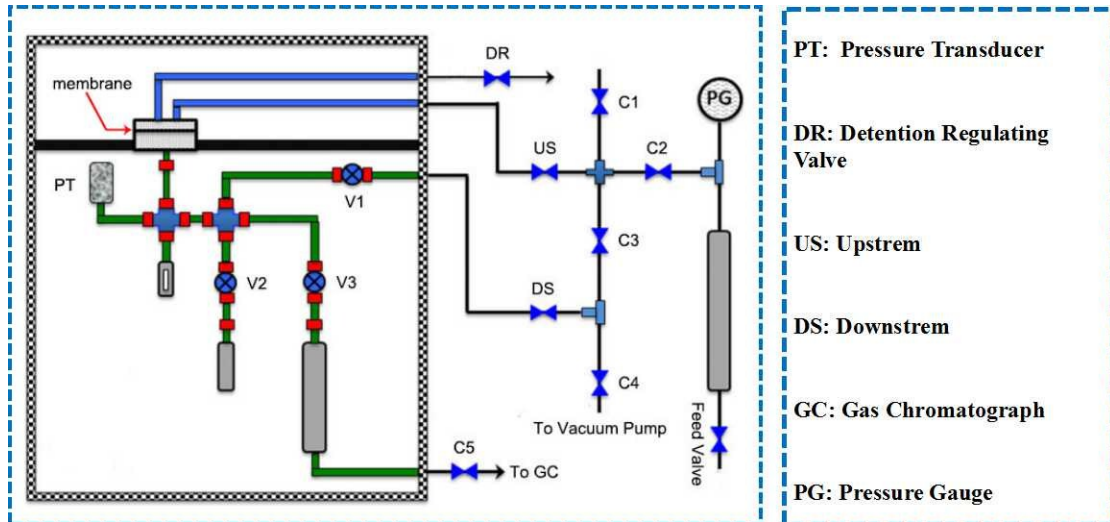

**Fig. S1** Schematic diagram of membrane gas permeability test apparatus.
